# Supplementary material
Source: PubMed Central journal article supplement (PMC4364186)
Supplement: pnas.201413896SI.pdf [file pnas.201413896SI.pdf]

# Supporting Information

Yuan et al. 10.1073/pnas.1413896112

## SI Materials and Methods

**Model to Describe the Minimum miRNA–ceRNA System.** The parameters in the minimum miRNA–ceRNA model (Fig. 1A) are described as follows. Gene1 or gene2 transcribes into ceRNA1 or ceRNA2 at a rate of  $k_{R_1}$  or  $k_{R_2}$ , respectively. Free ceRNA1 ( $R_1$ ) or ceRNA2 ( $R_2$ ) degrades at a rate of  $g_{R_1}$  or  $g_{R_2}$ , and translates to protein1 or protein2 at a rate  $k_{P_1}$  or  $k_{P_2}$ , respectively. Protein1 or protein2 degrades at a rate of  $g_{P_1}$  or  $g_{P_2}$ . miRNA transcribes at a rate of  $k_s$ , and the free miRNA ( $S$ ) degrades at a rate of  $g_s$ . The free miRNA binds ceRNA1 or ceRNA2 at a rate of  $k_{1+}$  or  $k_{2+}$  to form a  $C_1$  or  $C_2$  complex, respectively. The miRNA–ceRNA1 ( $C_1$ ) or miRNA–ceRNA2 ( $C_2$ ) complex dissociates at a rate of  $k_{1-}$  or  $k_{2-}$  or degrades at a rate of  $g_1$  or  $g_2$ , respectively. Along with the degradation, miRNA degrades with  $\alpha_1$  or  $\alpha_2$  possibility.

We describe the minimum miRNA–ceRNA model in Fig. 1A, using a set of differential equations as follows:

$$\begin{aligned}\frac{dS}{dt} &= k_s - g_s S - S(k_{1+}R_1 + k_{2+}R_2) + k_{1-}C_1 + k_{2-}C_2 \\ &\quad + (1 - \alpha_1)g_1 C_1 + (1 - \alpha_2)g_2 C_2, \\ \frac{dR_1}{dt} &= k_{R_1} - g_{R_1}R_1 - k_{1+}SR_1 + k_{1-}C_1, \\ \frac{dC_1}{dt} &= k_{1+}SR_1 - k_{1-}C_1 - g_1 C_1, \\ \frac{dR_2}{dt} &= k_{R_2} - g_{R_2}R_2 - k_{2+}SR_2 + k_{2-}C_2, \\ \frac{dC_2}{dt} &= k_{2+}SR_2 - k_{2-}C_2 - g_2 C_2.\end{aligned}$$

Solving these equations at steady state, we get

$$R_1 = \frac{1}{2} \left( R_1^0 - \lambda_1 - \theta_1 + \varphi_{21} + \sqrt{\left( (R_1^0 - \lambda_1 - \theta_1 + \varphi_{21})^2 + 4\lambda_1 R_1^0 \right)} \right) \quad \text{[S1]}$$

$$R_2 = \frac{1}{2} \left( R_2^0 - \lambda_2 - \theta_2 + \varphi_{12} + \sqrt{\left( (R_2^0 - \lambda_2 - \theta_2 + \varphi_{12})^2 + 4\lambda_2 R_2^0 \right)} \right), \quad \text{[S2]}$$

where

$$\begin{aligned}R_1^0 &= \frac{k_{R_1}}{g_{R_1}}, \\ \lambda_1 &= \frac{g_s}{\alpha_1 k_{1+}} \left( \frac{k_{1-}}{g_1} + 1 \right), \\ \theta_1 &= \frac{k_s}{\alpha_1 g_{R_1}}, \\ \varphi_{21} &= \frac{\alpha_2 g_{R_2} (R_2^0 - R_2)}{\alpha_1 g_{R_1}},\end{aligned}$$

$$\begin{aligned}R_2^0 &= \frac{k_{R_2}}{g_{R_2}}, \\ \lambda_2 &= \frac{g_s}{\alpha_2 k_{2+}} \left( \frac{k_{2-}}{g_2} + 1 \right), \\ \theta_2 &= \frac{k_s}{\alpha_2 g_{R_2}}, \\ \varphi_{12} &= \frac{\alpha_1 g_{R_1} (R_1^0 - R_1)}{\alpha_2 g_{R_2}}.\end{aligned}$$

Lumped parameters were introduced to simplify the presentation of Eqs. S1 and S2. Each of them has specific physical meanings. Assuming that  $g_i$ ,  $g_{R_i}$ ,  $g_s$ ,  $k_{i-}$ , and  $\alpha_i$  ( $i=1$  or  $2$ ) are fixed quantities,  $1/\lambda_i$  is proportional to miRNA–target association rate  $k_{i+}$ , and  $\theta_i$  is proportional to miRNA transcription rate  $k_s$ . So  $1/\lambda_i$  can reflect the binding strength between miRNA and ceRNA, and  $\theta_i$  can reflect miRNA expression level.  $R_i^0$  is the basal mRNA expression level when there is no miRNA regulation, and  $\varphi_{ji}$  represents the strength of cross-regulation on ceRNA  $i$  by ceRNA  $j$ .

The parameter  $\alpha$  ( $0 \leq \alpha \leq 1$ ) represents the probability that a miRNA is consumed after degrading its target. The expected number of target RNA molecules that one miRNA molecule can degrade is  $\lim_{K \rightarrow \infty} \sum_{k=1}^K k \alpha (1 - \alpha)^{k-1} = 1/\alpha$ . It is easier to estimate the circulation capacity of miRNAs by using their loss rates, rather than by using their recycling rates  $(1 - \alpha)$ . Therefore, we used the miRNA loss rate instead of the recycling rate, to represent miRNA circulation capacity.

**Effect of Endogenous Targets.** To gain insight about the effect of the endogenous miR-21 targets on the synthetic minimum ceRNA system, we treated all of the endogenous miR-21 targets as a pool and modeled them as a third ceRNA species in the model. Thus, we expanded the equations as follows:

$$\begin{aligned}\frac{dS}{dt} &= k_s - g_s S - S(k_{1+}R_1 + k_{2+}R_2 + k_{3+}R_3) \\ &\quad + k_{1-}C_1 + k_{2-}C_2 + k_{3-}C_3 + (1 - \alpha_1)g_1 C_1 \\ &\quad + (1 - \alpha_2)g_2 C_2 + (1 - \alpha_3)g_3 C_3,\end{aligned}$$

$$\frac{dR_1}{dt} = k_{R_1} - g_{R_1}R_1 - k_{1+}SR_1 + k_{1-}C_1,$$

$$\frac{dC_1}{dt} = k_{1+}SR_1 - k_{1-}C_1 - g_1 C_1,$$

$$\frac{dR_2}{dt} = k_{R_2} - g_{R_2}R_2 - k_{2+}SR_2 + k_{2-}C_2,$$

$$\frac{dC_2}{dt} = k_{2+}SR_2 - k_{2-}C_2 - g_2 C_2,$$

$$\frac{dR_3}{dt} = k_{R_3} - g_{R_3}R_3 - k_{3+}SR_3 + k_{3-}C_3,$$

$$\frac{dC_3}{dt} = k_{3+}SR_3 - k_{3-}C_3 - g_3C_3.$$

Solving these equations at steady state, we get

$$R_1 = \frac{1}{2} \left( R_1^0 - \lambda_1 - \theta_1' + \varphi_{21} + \sqrt{\left( (R_1^0 - \lambda_1 - \theta_1' + \varphi_{21})^2 + 4\lambda_1 R_1^0 \right)} \right)$$

$$R_2 = \frac{1}{2} \left( R_2^0 - \lambda_2 - \theta_2' + \varphi_{12} + \sqrt{\left( (R_2^0 - \lambda_2 - \theta_2' + \varphi_{12})^2 + 4\lambda_2 R_2^0 \right)} \right),$$

[S3]

where

$$R_1^0 = \frac{k_{R_1}}{g_{R_1}}, \quad R_2^0 = \frac{k_{R_2}}{g_{R_2}},$$

$$\lambda_1 = \frac{g_s}{\alpha_1 k_{1+}} \left( \frac{k_{1-}}{g_1} + 1 \right), \quad \lambda_2 = \frac{g_s}{\alpha_2 k_{2+}} \left( \frac{k_{2-}}{g_2} + 1 \right),$$

$$\theta_1 = \frac{k_s}{\alpha_1 g_{R_1}}, \quad \theta_2 = \frac{k_s}{\alpha_2 g_{R_2}},$$

$$\varphi_{21} = \frac{\alpha_2 g_{R_2} (R_2^0 - R_2)}{\alpha_1 g_{R_1}}, \quad \varphi_{12} = \frac{\alpha_1 g_{R_1} (R_1^0 - R_1)}{\alpha_2 g_{R_2}},$$

$$\varphi_{31} = \frac{\alpha_3 g_{R_3} (R_3^0 - R_3)}{\alpha_1 g_{R_1}}, \quad \varphi_{32} = \frac{\alpha_3 g_{R_3} (R_3^0 - R_3)}{\alpha_2 g_{R_2}},$$

$$\theta_1' = \theta_1 - \varphi_{31} = \frac{k_s - \alpha_3 g_{R_3} (R_3^0 - R_3)}{\alpha_1 g_{R_1}} = \frac{k_s'}{\alpha_1 g_{R_1}},$$

$$\theta_2' = \theta_2 - \varphi_{32} = \frac{k_s - \alpha_3 g_{R_3} (R_3^0 - R_3)}{\alpha_2 g_{R_2}} = \frac{k_s'}{\alpha_2 g_{R_2}}.$$

The form of Eq. S3 is almost identical to that of Eqs. S1 and S2. The existence of endogenous targets simply rescaled the parameter  $\theta$ , which represented the effective miRNA level.

**Model-Fitting Strategy.** For the ease of description, we used subscript  $m$  to represent mKate, subscript  $t$  to represent TagBFP, and subscript  $e$  to represent EYFP.  $M$  represents the free mRNA level.

As shown in Fig S1B, the TagBFP fluorescent mean values were linearly correlated with the EYFP and mKate mean values by using binning analysis, respectively. In addition, the fluorescence values were linearly correlated with the mRNA expression levels, respectively (Fig. S1 C–E). Thus, we reasoned that the TagBFP fluorescent value could be used to estimate the transcriptional levels of ceRNA1 and ceRNA2 in our experiments. As the fluorescent value measured by the flow cytometer was in an arbitrary unit, the absolute protein value between different channels was not directly comparable. The slope of the linear correlation between these protein values could be different. We took this property into account in our model as described below. **Estimate mRNA level by fluorescent value.** Based on results shown in Fig. S1C, we modeled the relationship between the TagBFP fluorescent value and the mRNA concentration, using the formula

$$\log_{10} \left( \frac{F_t}{F_t^0} \right) = K_t \log_{10} \left( \frac{M_t}{M_t^0} \right) + b_t, \quad [S4]$$

where  $M_t$  is the concentration of TagBFP mRNA molecules,  $M_t^0$  is a benchmark concentration of TagBFP mRNA molecules,  $F_t$  is the TagBFP fluorescent value,  $F_t^0$  is the benchmark fluorescent value,  $K_t$  is the slope, and  $b_t$  is the intercept. Based on Eq. S4, we get

$$\log_{10}(F_t) = K_t \log_{10}(M_t) + B_t,$$

$$\text{where } B_t = b_t + \log_{10}(F_t^0) - K_t \log_{10}(M_t^0). \quad [S5]$$

Based on Eq. S5, we estimated the TagBFP mRNA level as a function of its fluorescent value as follows:

$$M_t = 10^{((\log_{10}(F_t) - B_t)/K_t)}. \quad [S6]$$

We estimated the range of  $K_t$  based on the slope shown in Fig S1F and estimated that of  $B_t$  as the fluorescent value that separates the background and foreground cell populations. We estimated the parameters for iRFP, mKate, and EYFP, using the same methods as described above.

**Use of TagBFP fluorescent level to represent ceRNA transcriptional level.** We used a simple kinetic model to describe the mRNA level driven by a constitutive promoter,

$$\frac{dM}{dt} = k - gM,$$

where  $k$  is transcriptional rate,  $g$  is the degradation rate, and  $M$  is the mRNA level. At steady state,  $M = k/g$ .

As mKate (ceRNA1), EYFP (ceRNA2), and TagBFP were all driven by constitutive promoters, the transcription levels of mKate and EYFP were linearly correlated to the mRNA level of TagBFP at steady state,

$$k_m = K_1 g_m M_t$$

$$k_e = K_2 g_e M_t, \quad [S7]$$

where,  $K_1$  and  $K_2$  are constants that reflect relative transcription rate. From Eqs. S5 and S7, we get

$$\log_{10}(F_m) = \frac{K_m}{K_t} \log_{10}(F_t) + \log_{10}(K_1) - \frac{B_t}{K_t} + \frac{B_m}{K_m},$$

$$\log_{10}(F_e) = \frac{K_e}{K_t} \log_{10}(F_t) + \log_{10}(K_2) - \frac{B_t}{K_t} + \frac{B_e}{K_e}.$$

These two equations suggest that the EYFP and mKate fluorescent values are positively and linearly correlated with TagBFP values, and the slopes are determined by the scales of arbitrary units of these fluorescent values.

The transcriptional levels of mKate and EYFP could be represented by TagBFP fluorescent level as follows:

$$k_m = K_1 g_m 10^{((\log_{10}(F_t) - B_t)/K_t)}$$

$$k_e = K_2 g_e 10^{((\log_{10}(F_t) - B_t)/K_t)}. \quad [S8]$$

From Eqs. S8 we can get

$$\log_{10}(k_m) = \frac{1}{K_t} \log_{10}(F_t) + T_1$$

$$\log_{10}(k_e) = \frac{1}{K_t} \log_{10}(F_t) + T_2,$$

where  $T_1$  and  $T_2$  are constants. We can see that logarithmic-transformed TagBFP fluorescent level are linearly corrected to the log-transformed transcriptional rate of mKate and EYFP.

Thus, we reasoned that TagBFP fluorescent level could be used to indicate the transcriptional level of ceRNAs.

**Parameter fitting.** Based on Eqs. S1, S2, S6, and S8, we could formulate the fitting problem as

$$\log_{10}(F_m) = K_m \log_{10} \left( K_1 10^{((\log_{10}(F_i) - B_i)/K_i)} - \lambda_1 - \theta_1 + \sigma \left( K_2 10^{((\log_{10}(F_i) - B_i)/K_i)} - 10^{((\log_{10}(F_e) - B_e)/K_e)} \right) \right) + \sqrt{\left( K_1 10^{((\log_{10}(F_i) - B_i)/K_i)} - \lambda_1 - \theta_1 + \sigma \left( K_2 10^{((\log_{10}(F_i) - B_i)/K_i)} - 10^{((\log_{10}(F_e) - B_e)/K_e)} \right) \right)^2 + 4\lambda_1 K_1 10^{((\log_{10}(F_i) - B_i)/K_i)}} \right) + B_m \quad [\text{S9}]$$

$$\log_{10}(F_e) = K_e \log_{10} \left( K_2 10^{((\log_{10}(F_i) - B_i)/K_i)} - \lambda_2 - \frac{\theta_1}{\sigma} + \frac{(K_1 10^{((\log_{10}(F_i) - B_i)/K_i)} - 10^{((\log_{10}(F_m) - B_m)/K_m)})}{\sigma} \right) + \sqrt{\left( K_2 10^{((\log_{10}(F_i) - B_i)/K_i)} - \lambda_2 - \frac{\theta_1}{\sigma} + \frac{(K_1 10^{((\log_{10}(F_i) - B_i)/K_i)} - 10^{((\log_{10}(F_m) - B_m)/K_m)})}{\sigma} \right)^2 + 4\lambda_2 K_2 10^{((\log_{10}(F_i) - B_i)/K_i)}} \right) + B_e, \quad [\text{S10}]$$

where  $\sigma = \alpha_2 g_{R_2} / \alpha_1 g_{R_1}$ .

The parameters we need to fit are  $K_i, B_i, K_e, B_e, K_m, B_m, K_1, K_2, \lambda_1, \theta_1$ , and  $\sigma$ . We used stepwise least-squares regression to fit this model. First, we fitted the data obtained in the absence of Dox, which contain only mKate and TagBFP fluorescence data. In this case, we did not have to consider Eq. S10, so Eq. S9 was simplified to the following form:

$$\log_{10}(F_m) = K_m \log_{10} \left( K_1 10^{((\log_{10}(F_i) - B_i)/K_i)} - \lambda_1 - \theta_1 + \sqrt{\left( K_1 10^{((\log_{10}(F_i) - B_i)/K_i)} - \lambda_1 - \theta_1 \right)^2 + 4\lambda_1 K_1 10^{((\log_{10}(F_i) - B_i)/K_i)}} \right) + B_m. \quad [\text{S11}]$$

The parameters that we need to fit are  $K_i, B_i, K_m, B_m, K_1, \lambda_1$ , and  $\theta_1$ .

Next, the mKate, TagBFP, and EYFP data from Dox+ samples were used for data fitting. The parameters that we need to fit are  $K_i, B_i, K_e, B_e, K_m, B_m, K_1, K_2, \lambda_1, \theta_1$ , and  $\sigma$ , among which  $K_i, B_i, K_m, B_m, K_1, \lambda_1$ , and  $\theta_1$  were adopted from the first step. We used the *lsqcurvefit* function in MATLAB to fit the data. Because the fitting is in a multiple-parameter space, the results given by gradient descent algorithms might be trapped into local solutions. To overcome this problem, we started the fitting in random initial values and made the decision according to the parameter histogram.

**Loss rate ratio estimation.** To estimate the loss rate ratio  $\alpha_2/\alpha_1$ , we did the model fitting for the (partially paired EYFP)–(partially paired mKate) target pair and for the (perfectly paired EYFP)–(partially paired mKate) target pair in Fig. 5B. Assuming free mRNA degradation rates  $g_{R_1}, g_{R_2}$  are constant in both experiments,  $\sigma$  indicates the miRNA loss rate ratio  $\alpha_2/\alpha_1$  of the ceRNA2–miRNA complex to the ceRNA1–miRNA complex. We assumed that all parameters in Eqs. S9 and S10 of the two datasets are identical, except for  $K_1, K_2, \lambda_2$ , and  $\sigma$ . Because the gradient descent algorithm used to fit parameters could be trapped into local optimal solutions, parameter fitting was conducted 1,000 times by using random initial parameter values for each case, and the most frequent value was used as the final parameter estimation.

**Reagents and Enzymes.** Restriction endonuclease, polynucleotide kinase (PNK), T4 DNA ligase, Quick DNA ligase, Taq DNA Polymerases, and Phusion High-Fidelity DNA polymerase were purchased from New England Biolabs. Oligonucleotides were

synthesized by Sangon Biotech and Genewiz. Oligonucleotide sequences are listed in Table S1. Dox was purchased from Clontech. Gateway BP and LR reactions (Life Technologies) were performed, following the manufacturer's protocol.

**Cell Transfection and Fluorescence-Activated Cell Sorting Measurement.** The HEK293 cell line (Life Technologies) was grown in Dulbecco's modified Eagle's medium (DMEM) complete media [DMEM supplemented with 4.5 g/L glucose, 0.045 g/mL of penicillin, 0.045 g/mL streptomycin, and 10% (vol/vol) FBS (Life Technologies)] at 37 °C, 100% humidity and 5% CO<sub>2</sub>. Transfection experiments were performed in 24-well plates, using Lipofectamine LTX (Life Technologies), following the manufacturer's protocol. The plasmid pDT7004 (pUBI-linker-NOS) that contains a maize ubiquitin promoter (UBI) followed by a NOS terminator (transcription terminator derived from the nopaline synthase gene from *Agrobacterium tumefaciens*) with no protein-coding sequences between UBI and NOS was used to ensure an equal amount of plasmid DNA in each experiment. The amount of plasmid DNA and the final concentration of Dox added to each well are listed in Table S2.

Cells were harvested 48 h posttransfection for flow cytometry analysis as described previously (1, 2). A Fortessa flow analyzer (BD Bioscience) was used for FACS analysis with the following settings: TagBFP was measured using a 405-nm laser and a 450/50 filter with a photomultiplier tube (PMT) at 245 V, mKate was measured with a 561-nm laser and a 670/30 filter using a PMT at 300 V, EYFP was measured with a 488-nm laser and a 530/30 filter using a PMT at 176 V, and iRFP was measured using a 640-nm laser and a 780/60 filter with a PMT at 445 V. For each sample,  $\sim 5 \times 10^4$  to  $\sim 1 \times 10^5$  cell events were collected.

To test whether the fluorescent value linearly correlates to the corresponding mRNA level, we cotransfected plasmids encoding TagBFP, EYFP, and mKate into HEK293 cells (Table S2 and Fig. S1). To test whether the iRFP fluorescent intensity linearly correlates to miRNA transcription level, the plasmid encoding iRFP and miR-21 was transfected into HEK293 cells (Table S2 and Fig. S1). TagBFP-positive or iRFP-positive cells were divided into seven or eight bins at equal logarithmic scales, respectively, ranging from the lowest to the highest TagBFP or iRFP values. For each bin,  $\sim 1 \times 10^4$  cells were collected in DMEM complete media by using a BD

FACS Aria III cell sorter with the following configurations: TagBFP was measured using a 405-nm laser and a 450/50 filter with a PMT at 280 V, mKate was measured with a 561-nm laser and a 610/20 filter using a PMT at 330 V, EYFP was measured with a 488-nm laser and a 530/30 filter using a PMT at 250 V, and iRFP was measured using a 633-nm laser and a 780/60 filter with a PMT at 484 V.

**FACS Data Processing and Model Fitting.** Fluorescence compensations were subtracted from the raw FACS data (Fig. S6). TagBFP-positive cell events were gated according to the iRFP channel to make sure that the miR-21 level is roughly a constant in each TagBFP bin (Fig. S2). Then cells were sorted by TagBFP values, and every 150 cell events were grouped into each nonoverlapped bin (Fig. S1A). The median values of indicated fluorescent intensities in each bin were used for modeling and in scatter plots that were drawn in Matlab (MathWorks) or the R “Bioconductor” package (3).

To create a miR-21 gradient, we transfected HEK293 cells with increasing amounts of the plasmid that encodes iRFP and miR-21. Cell events whose iRFP values ranked from 45% to 70% of all TagBFP-positive events were gated for analysis. These gated cells have an approximately equal mean value of TagBFP normal distribution, but display a gradually increased mean value of iRFP normal distribution with increasing amount of the iRFP plasmid in the transfection experiment (Fig. S2). The *lsqcurvefit* function in MATLAB was used to fit model parameters.

**RNA Extraction and qRT-PCR.** RNA was extracted from sorted cells, using the miRNeasy Mini Kit (Qiagen). The miScript II RT Kit (Qiagen) was used for miRNA expression analysis. The real-time PCR reactions were performed in triplicate, using SYBR Select Master Mix (Life Technologies). Relative changes in gene expression were calculated using the  $2^{-\Delta\Delta CT}$  method and normalized for miRNA and mRNA expression levels by using U6 and  $\beta$ -actin levels respectively. The primers used in qRT-PCR are listed in Table S1.

**RNA Library Preparation and Sequencing.** The plasmids used in Fig. S5 are listed in Table S2. TagBFP-positive cells were sorted into three bins at equal logarithmic scale 48 h posttransfection. RNA was extracted using TRIzol (Life Technologies) and mRNA isolation was performed using the NEBNext Poly(A) mRNA Magnetic Isolation kit (New England Biolabs). Reverse transcription was performed using the ProtoScript II First-Strand cDNA Synthesis Kit, and the second-strand cDNA was synthesized using the NEBNext mRNA Second-Strand Synthesis Module (New England Biolabs). The cDNA was fragmented using Covaris S220 and purified using AMPure XP Beads (Beckman Coulter). The adapter was ligated using T4 DNA ligase (Enzymatics). PCR was performed using an End Repair/dA-tail ligated DNA template to include unique barcodes for sample identification (Enzymatics). All PCR products were pooled in an equimolar ratio and sequenced on the rapid mode by using HiSeq2500 (Illumina).

**RNA Sequencing Analysis.** TagBFP-positive cells were sorted into three bins at equal logarithmic scale 48 h posttransfection for Dox+ and Dox- samples, respectively. Poly(A)<sup>+</sup> transcripts were isolated for HiSeq2500 (Illumina) sequencing. The Bowtie2 index was created based on the human UCSC genome and known Gene transcriptome19, and paired-end reads were aligned directly to this index using Tophat with command line options -r 500 -p 8. Next, cufflinks-2.2.1 was run with default parameters on the alignments (accepted\_hits.bam) created by Tophat to estimate expression levels for each transcript [fragments per kilobase of transcript per million mapped reads (FPKM)].

#### Plasmid DNA Constructs.

##### Entry vectors.

pZ246 (pEntr\_L4\_MCS\_R1) was made by inserting annealed oligos p1 and p2 into pENTR\_L4-CMV-R1 (4).

pZ250 (pEntr\_L4\_CAG\_R1) was made by subcloning the CAG promoter from pCAG-DsRed-FF (1) into pZ246, using PacI and EcoRI.

pZ251 (pEntr\_L4\_TRE\_R1) was made by subcloning the TRE promoter from pTRE-LacI-FF5 (1) into pZ246 using SpeI and XhoI.

pZ451 (pEntr\_L1\_mKate-MCS\_L2) was made by inserting a fragment containing multiple cloning sites through annealed oligos p3 and p4 into pZ258, using NotI and HindIII. pZ258 (pEntr\_L1\_mKate-FF5-FF4\_L2) was made by inserting an FF5 $\times$ 4-FF4 $\times$ 3 fragment from pCAGop-DsRed-FF5-FF4 (1) into pZ245, using NotI and XmaI. pZ245 (pEntr-L1\_mKate\_NotIXmaI\_L2) was made by a BP reaction with pDNOR211P1P2 (Life Technologies) and B1\_mKate\_NotIXmaI\_B2, following the manufacturer's protocol. B1\_mKate\_NotIXmaI\_B2 was PCR amplified from pENTR\_L1\_mKate\_L2 (4) by using primers p5 and p6.

pZ452 (pENTR\_L1\_EYFP-MCS\_L2) was made by inserting a fragment containing multiple cloning sites through annealed oligos p3 and p4 into pENTR\_L1\_EYFP-FF5\_L2, using NotI and HindIII. pENTR\_L1\_EYFP-FF5\_L2 was made by inserting an EYFP fragment from pCAG-EYFP (1) into pZ263, using AgeI and NotI. pZ263 (pENTR\_L1\_EYFP-2A-rtTA-FF5\_L2) was made by a BP reaction with pDNOR211P1P2 (Life Technologies) and B1\_EYFP-2A-rtTA-FF5\_B2, following the manufacturer's protocol. B1\_EYFP-2A-rtTA-FF5\_B2 was PCR amplified from pZ248 by using primers p7 and p8. pZ248 (pCMV-EYFP-2A-rtTA-FF5 $\times$ 4) was made by inserting a PCR fragment EYFP-2A into pCMV-rtTA-FF5 $\times$ 4 (1), using NheI, and the fragment was amplified from pCAG-EYFP using primers p9 and p10.

pZ443 (pENTR\_L1\_rtTA-2A-Puro-FF5\_L2) was made by inserting a puromycin fragment into pZ305 by using SpeI and NotI. The puromycin fragment was PCR amplified from pENTR\_L1\_Puro\_L2 (4), using primers p11 and p12. pZ305 (pENTR\_L1\_rtTA-2A-Hyg-FF5\_L2) was made by inserting rtTA-2A into pZ294 by using AgeI and XbaI. The fragment was PCR amplified from pZ091 (pCMV-rtTA-FF5) (1), using primers p13 and p14. pZ294 (pENTR\_L1\_EYFP-2A-Hyg-FF5\_L2) was made by inserting Hygromycin from pCMV-IRES2-Hygro into pZ263 (1) by XbaI and NotI.

pZ393 (pENTR\_L1\_TagBFP-FF5\_L2) was made by inserting a TagBFP fragment into pZ263 by using AgeI and NotI. The TagBFP fragment was PCR amplified from pTagBFP-N purchased from Evrogen by using primers p15 and p16.

pZ323 (pENTR\_L1\_Cerulean-miR-21\_L2) was made by inserting miR-21 into pZ310 (1) by using NotI and HindIII. The miR-21 fragment was PCR amplified from the purified human genome by using primers p17 and p18 containing an intron splice donor site in the 5' primer and an intron splice acceptor site and a pyrimidine-rich region in the 3' primer.

pZ508 (pCMV-iRFP) was purchased from Addgene.

pZ304 (pENTR\_L1\_RhoAct-2A-Rec-FF3\_L2) was made by inserting the FF3 $\times$ 4 target site through annealed oligos p19 and p20 into pZ297 by using NotI and HindIII. pZ297 (pENTR\_L1\_RhoAct-2A-Rec-T294\_L2) was made by subcloning RhoAct-2A-Rec from pZ208 (pCAGop-RhoAct-2A-RhoRec-FF5 $\times$ 4) (5) into pZ268 (1) by NcoI and NotI.

pZ296 (pEntr-L4\_5xUAS\_R1) was made by subcloning 5 $\times$ Gal4 from pZ229 (5 $\times$ Gal4-CMVmini-dsRed-FF5 $\times$ 4) (1) into pZ246, using PacI and EcoRI.

pB035 (pEntr\_L1\_EYFP-1 $\times$ PDCCD4\_L2) was made by subcloning the 1 $\times$ PDCCD4 miR-21 target site from pcDNA3.1-Luc (6) into pZ452 by NotI and SalI.



pB100 (pEntr\_L1\_EYFP-4×PDCD4\_L2) was made by inserting the 4×PDCD4 miR-21 target site through annealed oligos b13009, b13010, b13011, and b13012 into pZ452 by NotI and Sall.

pB178 (pEntr\_L1\_EYFP-8×PDCD4\_L2) was made by inserting the 4×PDCD4 miR-21 target site through annealed oligos b13021, b13022, b13023, b13024, b13025, and b13026 into pB100 by KpnI and XmaI.

pB182 (pEntr\_L1\_EYFP-12×PDCD4\_L2) was made by inserting the 4×PDCD4 miR-21 target site through annealed oligos b13009, b13010, b13011, and b13012 into pB178 by NotI and Sall.

pB252 (pEntr\_L1\_EYFP-4×BMPr2III\_L2) was made by inserting the 4×BMPr2III miR-21 target site through annealed oligos b13070, b13071, b13072, and b13073 into pZ452 by NotI and XmaI.

pB254 (pEntr\_L1\_EYFP-4×MTAP\_L2) was made by inserting the 4×MTAP miR-21 target site through annealed oligos b13078, b13079, b13080, and b13081 into pZ452 by NotI and XmaI.

pB256 (pEntr\_L1\_EYFP-4×PDCD4II\_L2) was made by inserting the 4×PDCD4II miR-21 target site through annealed oligos b13086, b13087, b13088, and b13089 into pZ452 by NotI and XmaI.

pB258 (pEntr\_L1\_EYFP-4×PPARA\_L2) was made by inserting the 4×PPARA miR-21 target site through annealed oligos b13094, b13095, b13096, and b13097 into pZ452 by NotI and XmaI.

pB260 (pEntr\_L1\_EYFP-4×RECKII\_L2) was made by inserting the 4×RECKII miR-21 target site through annealed oligos b13102, b13103, b13104, and b13105 into pZ452 by NotI and XmaI.

pB037 (pEntr\_L1\_mKate-1×PDCD4\_L2) was made by subcloning the 1×PDCD4 miR-21 target site from pcDNA3.1-Luc (6) into pZ451 by NotI and Sall.

pB102 (pEntr\_L1\_mKate-4×PDCD4\_L2) was made by inserting annealed oligos b13009, b13010, b13011, and b13012 into pZ451 by NotI and Sall.

pB194 (pEntr\_L1\_mKate-4×PDCD4-MCS\_L2) was made by inserting annealed oligos b13035 and b13036 into pB102 by KpnI.

pB179 (pEntr\_L1\_mKate-8×PDCD4\_L2) was made by inserting the 4×PDCD4 miR-21 target site through annealed oligos b13021, b13022, b13023, b13024, b13025, and b13026 into pB194 by KpnI and XmaI.

pB183 (pEntr\_L1\_mKate-12×PDCD4\_L2) was made by inserting annealed oligos b13009, b13010, b13011, and b13012 into pB179 by NotI and Sall.

pB261 (pEntr\_L1\_mKate-4×BMPr2III\_L2) was made by inserting annealed oligos b13070, b13071, b13072, and b13073 into pZ451 by NotI and XmaI.

pB269 (pEntr\_L1\_mKate-4×RECKII\_L2) was made by inserting annealed oligos b13070, b13071, b13072, and b13073 into pZ451 by NotI and XmaI.

pB045 (pEntr\_L1\_iRFP-miR-21\_L2) was made by PCR-amplified iRFP from pZ508, using primer ch-5 and b12009 inserted into pZ323 by AgeI and NotI.

pB399 (pEntr\_L1\_EYFP-4×T21\_L2) was made by inserting the 4×T21 miR-21 target site from pZ509 into pZ452 by NotI and HindIII. pZ509 (pEntr\_L1\_mKate-T21-FF4\_L2) was made by inserting the 4×T21 miR-21 target site from pZ252 into pZ258 by NotI and HindIII. pZ252 (pEntr\_L1\_rtTA-4×T21\_L2) was made by a BP reaction with pDNOR211P2 (Life Technologies) and B1\_rtTA-4×T21\_B2, following the manufacturer's protocol. B1\_rtTA-4×T21\_B2 was PCR amplified from pZ090 (pCMV-rtTA-T21×4) (1), using primers p21 and p22.

#### Expression vectors.

pB003 (pZD\_Seq1-CAG-rtTA-2A-Puro-FF5-Seq2) was prepared by combining pZ250 (pENTR\_L4-CAG\_L1) and pZ443 (pENTR\_L1-rtTA-2A-Puro-FF5\_L2) with pZDonor\_1-GTW-2 in a Gateway LR reaction.

pB018 (pZD\_Seq5-CAG-TagBFP-FF5-Seq6) was prepared by combining pZ250 (pENTR\_L4-CAG\_L1) and pZ393 (pENTR\_L1-TagBFP-FF5\_L2) with pZDonor\_5-GTW-6 in a Gateway LR reaction.

pB040 (pZD\_Seq3-TRE-EYFP-1×PDCD4-Seq4) was prepared by combining pZ251 (pENTR\_L4-TRE\_L1) and pB035 (pENTR\_L1-EYFP-1×PDCD4\_L2) with pZDonor\_3-GTW-4 in a Gateway LR reaction.

pB044 (pZD\_Seq3-TRE-EYFP-MCS-Seq4) was prepared by combining pZ251 (pENTR\_L4-TRE\_L1) and pZ452 (pENTR\_L1-EYFP-MCS\_L2) with pZDonor\_3-GTW-4 in a Gateway LR reaction.

pB104 (pZD\_Seq3-TRE-EYFP-4×PDCD4-Seq4) was prepared by combining pZ251 (pENTR\_L4-TRE\_L1) and pB100 (pENTR\_L1-EYFP-4×PDCD4\_L2) with pZDonor\_3-GTW-4 in a Gateway LR reaction.

pB180 (pZD\_Seq3-TRE-EYFP-8×PDCD4-Seq4) was prepared by combining pZ251 (pENTR\_L4-TRE\_L1) and pB178 (pENTR\_L1-EYFP-8×PDCD4\_L2) with pZDonor\_3-GTW-4 in a Gateway LR reaction.

pB184 (pZD\_Seq3-TRE-EYFP-12×PDCD4-Seq4) was prepared by combining pZ251 (pENTR\_L4-TRE\_L1) and pB182 (pENTR\_L1-EYFP-12×PDCD4\_L2) with pZDonor\_3-GTW-4 in a Gateway LR reaction.

pB400 (pZD\_Seq3-TRE-EYFP-4×T21-Seq4) was prepared by combining pZ251 (pENTR\_L4-TRE\_L1) and pB399 (pENTR\_L1-EYFP-4×T21\_L2) with pZDonor\_3-GTW-4 in a Gateway LR reaction.

pB106 (pZD\_Seq2-hEF1α-mKate-4×PDCD4-Seq3) was prepared by combining pZ529 (pENTR\_L4-hEF1α\_L1) (4) and pB102 (pENTR\_L1-mKate-4×PDCD4\_L2) with pZDonor\_2-GTW-3 in a Gateway LR reaction.

pB251 (pZD\_Seq2-hEF1α-mKate-Seq3) was prepared by combining pZ529 (pENTR\_L4-hEF1α\_L1) (4) and pZ245 (pENTR\_L1-mKate\_L2) with pZDonor\_2-GTW-3 in a Gateway LR reaction.

pB279 (pZD\_Seq2-hEF1α-mKate-4×BMPr2III-Seq3) was prepared by combining pZ529 (pENTR\_L4-hEF1α\_L1) (4) and pB261 (pENTR\_L1-mKate-4×BMPr2III\_L2) with pZDonor\_2-GTW-3 in a Gateway LR reaction.

pB287 (pZD\_Seq2-hEF1α-mKate-4×RECKII-Seq3) was prepared by combining pZ529 (pENTR\_L4-hEF1α\_L1) (4) and pB269 (pENTR\_L1-mKate-4×RECKII\_L2) with pZDonor\_2-GTW-3 in a Gateway LR reaction.

pB328 (pZD\_Seq3-hEF1α-iRFP-miR-21-Seq4) was prepared by combining pZ529 (pENTR\_L4-hEF1α\_L1) (4) and pB045 (pENTR\_L1-iRFP\_L2) with pZDonor\_3-GTW-4 in a Gateway LR reaction.

pB270 (pZD\_Seq3-TRE-EYFP-4×BMPr2III-Seq4) was prepared by combining pZ251 (pENTR\_L4-TRE\_L1) and pB252 (pENTR\_L1-EYFP-4×BMPr2III\_L2) with pZDonor\_3-GTW-4 in a Gateway LR reaction.

pB272 (pZD\_Seq3-TRE-EYFP-4×MATP-Seq4) was prepared by combining pZ251 (pENTR\_L4-TRE\_L1) and pB254

(pENTR\_L1-EYFP-4×MATP\_L2) with pZDonor\_3-GTW-4 in a Gateway LR reaction.

pB274 (pZD\_Seq3-TRE-EYFP-4×PDCD4II-Seq4) was prepared by combining pZ251 (pENTR\_L4-TRE\_L1) and pB256 (pENTR\_L1-EYFP-4×PDCD4II\_L2) with pZDonor\_3-GTW-4 in a Gateway LR reaction.

pB276 (pZD\_Seq3-TRE-EYFP-4×PPARA-Seq4) was prepared by combining pZ251 (pENTR\_L4-TRE\_L1) and pB258 (pENTR\_L1-EYFP-4×PPARA\_L2) with pZDonor\_3-GTW-4 in a Gateway LR reaction.

pB278 (pZD\_Seq3-TRE-EYFP-4×RECKII-Seq4) was prepared by combining pZ251 (pENTR\_L4-TRE\_L1) and pB260

(pENTR\_L1-EYFP-4×RECKII\_L2) with pZDonor\_3-GTW-4 in a Gateway LR reaction.

pB046 (pZD\_Seq5-5×UAS-iRFP-miR-21-Seq6) was prepared by combining pZ296 (pENTR\_L4-5×UAS\_L1) and pB045 (pENTR\_L1-iRFP-miR-21\_L2) with pZDonor\_5-GTW-6 in a Gateway LR reaction.

pZ316 (pZD\_Seq2-hEF1α-RheoRec-2A-Rec-FF3-Seq3) was prepared by combining pZ529 (pENTR\_L4-hEF1α\_L1) (4) and pZ304 (pENTR\_L1-RheoRec-2A-Rec-FF3\_L2) with pZDonor\_2-GTW-3 in a Gateway LR reaction.

All of the primers used in plasmid construction are listed in Table S1.

- Xie Z, Wroblewska L, Prochazka L, Weiss R, Benenson Y (2011) Multi-input RNAi-based logic circuit for identification of specific cancer cells. *Science* 333(6047):1307–1311.
- Bleris L, et al. (2011) Synthetic incoherent feedforward circuits show adaptation to the amount of their genetic template. *Mol Syst Biol* 7:519.
- Hahne F, et al. (2009) flowCore: A Bioconductor package for high throughput flow cytometry. *BMC Bioinformatics* 10:106.
- Guye P, Li Y, Wroblewska L, Duportet X, Weiss R (2013) Rapid, modular and reliable construction of complex mammalian gene circuits. *Nucleic Acids Res* 41(16):e156.
- Leisner M, Bleris L, Lohmueller J, Xie Z, Benenson Y (2010) Rationally designed logic integration of regulatory signals in mammalian cells. *Nat Nanotechnol* 5(9):666–670.
- Chen Y, et al. (2008) MicroRNA-21 down-regulates the expression of tumor suppressor PDCD4 in human glioblastoma cell T98G. *Cancer Lett* 272(2):197–205.

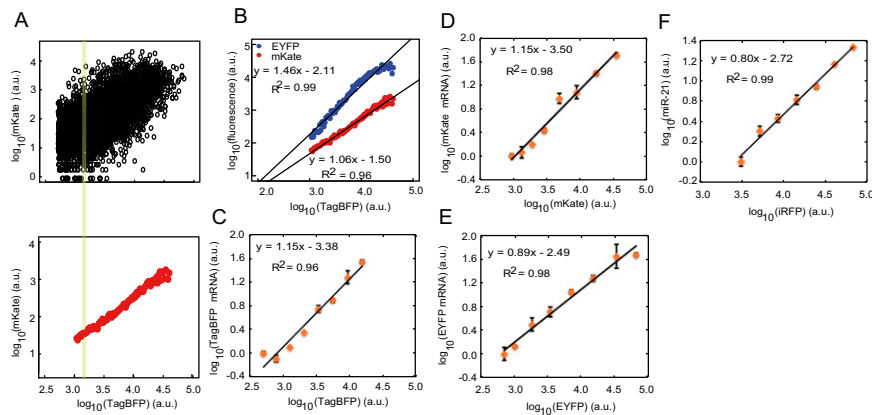

**Fig. S1.** Binning process of FACS data and the correlation between fluorescent intensities and miRNA/mRNA levels. (A) An example of the binning process of FACS data. *Top* plot represents an example of raw FACS data. The yellow bar represents an example of the binning process that is sorted by TagBFP. Red circles in *Bottom* plot represent mean values of the indicated fluorescence. (B) The linear relationship of different fluorescent intensities. Black lines represent the linear regression lines of TagBFP vs. EYFP (blue circles) and TagBFP vs. mKate (red circles). (C–F) The positive linear correlation between TagBFP (C), mKate (D), EYFP (E), and iRFP (F) fluorescent intensities and the corresponding miRNA or mRNA levels measured by qRT-PCR, respectively.

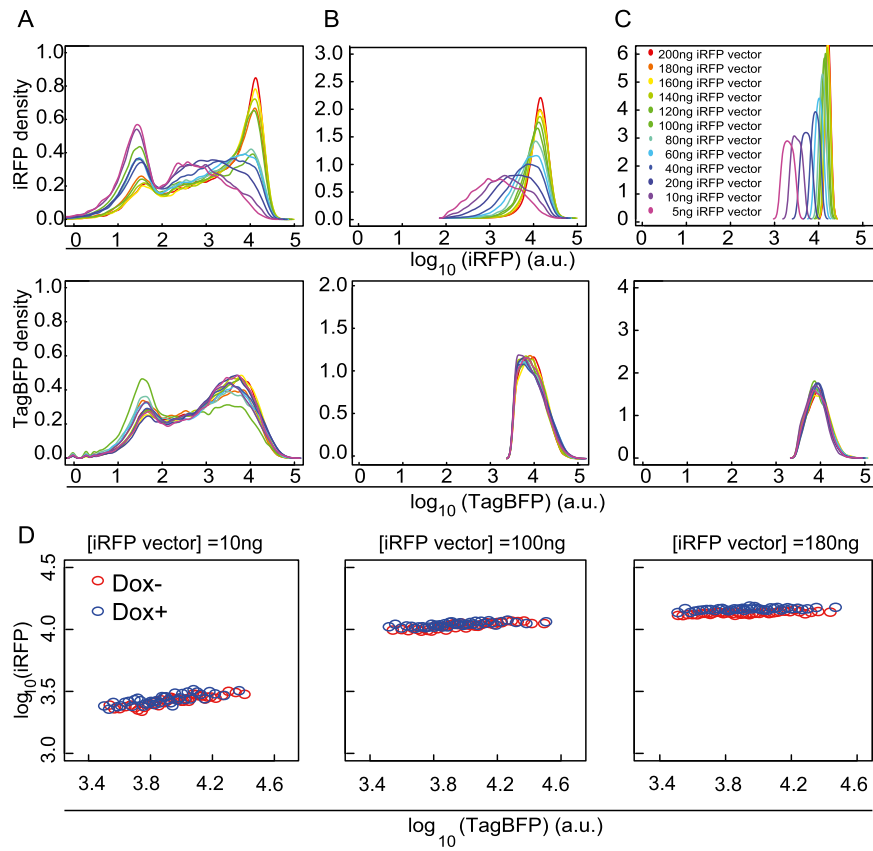

**Fig. S2.** The processing procedure for FACS data. Colored lines represent density distributions of cells transfected with various amounts of iRFP plasmid. (A) Histogram of the raw iRFP and TagBFP FACS data. (B) Histogram of the iRFP and TagBFP gated with iRFP > 0 and TagBFP > 3,000. (C) Cells whose iRFP value ranked from 45% to 70% of all data in B were selected for analysis. These gated cells had an approximately equal mean value of TagBFP normal distribution, but displayed a gradually increased mean value of iRFP normal distribution with increasing amount of the iRFP plasmid in the transfection experiment. (D) The correlation between TagBFP and iRFP of the processed FACS data. The three panels from *Left* to *Right* corresponded to the 2nd, 7th, and 11th panels in Fig. 2C.







**Table S1. Information of oligonucleotides used in this study**

| Name                    | Primer sequences                                                                                                 |
|-------------------------|------------------------------------------------------------------------------------------------------------------|
| For vector construction |                                                                                                                  |
| p1                      | AATTCTCGAGTTAATTAAGTGGCGCGCCG                                                                                    |
| p2                      | AATTCGGCGCGCCACTAGTTTAATTAAGTGGCGCGCCG                                                                           |
| p3                      | GGCCGCTCAGATCTCGAGCTCA                                                                                           |
| p4                      | AGCTTGAGCTCGAGATCTGAGGC                                                                                          |
| p5                      | GGGGACAAGTTTGTACAAAAAAGCAGGCTGATCGCCACCATGGTGTG                                                                  |
| p6                      | GGGGACCACTTTGTACAAAGAAAGCTGGGTACCCGGGTGCGGCCGCATCAATTAAGTTTGTGCCCC                                               |
| p7                      | GGGGACAAGTTTGTACAAAGAAAGCAGGCTGATTACCGGTGCGCCACCATG                                                              |
| p8                      | GGGGACCACTTTGTACAAAGAAAGCTGGGTAGATCAGTTATCTAGATCCCGTGG                                                           |
| p9                      | TTTGCTAGCTTACCGGTGCGCCACCATGGTGTGAGC                                                                             |
| p10                     | TTTGCTAGCTGGGCTGGGTTCTCTCCACGTGCGCGGCTGCTTCAGCAGAGAGAAGTTGGTGGCGCCAGATCCCTTGTACAGCTCG-TCCATGC                    |
| p11                     | TTTACTAGTATGACCGAGTACAAGCCACG                                                                                    |
| p12                     | TTTGCGGCGCTCAGGCACCGGGCTTGGCG                                                                                    |
| p13                     | TTTACCGGTACCATGTCTAGACTGGACAAG                                                                                   |
| p14                     | TTGCTAGCACTAGTTGGGCTGGGTTCTCTCCACGTGCGCGGCTGCTTCAGCAGAGAGAAGTTGGTGGCGCCAGATCCCCGGGG-AGCATGTCAAGG                 |
| p15                     | TTTACCGGTGCGCCACCATGAGCG                                                                                         |
| p16                     | TTTGCGGCGCTTAGTGCCTCAGTTTGTAGG                                                                                   |
| p17                     | TTTGCGGCGCCAGGTGAGTCCAGTTTCTTGGCTTCTGTAAG                                                                        |
| p18                     | TTAAGCTTCTGAAGGTCAAGTAAACAGTCATACAGCTAGAAAAGTCCCTGAAAAAAGAAATTAGTTAAGAAG                                         |
| p19                     | GGCCGCAACGATATGGGCTGAATACAATACCAACGATATGGGCTGAATACAATACCAACGATATGGGCTGAATACAATACCA-AACGATATGGGCTGAATACAATACA     |
| p20                     | AGCTTGATTGTATTAGCCCATATCGTTTGGTATTGTATTAGCCCATATCGTTTGGTATTGTATTAGCCCATATCGTTTGGTATTGT-ATTAGCCCATATCGTTTGC       |
| p21                     | GGGGACAAGTTTGTACAAAAAAGCAGGCTGAACCATGTCTAGACTGGACAAGAGC                                                          |
| p22                     | GGGGACCACTTTGTACAAAGAAAGCTGGGTAGATCAGTTATCTAGATCCCGTGG                                                           |
| b13009                  | GGCCAGTGAATATTCTAATAAGCTACCTTTTGAAGTGCATGTTAAGTGAATATTCTAATAAGCTACCTTTTGTAAAG                                    |
| b13010                  | GGCATTACAAAAGGTAGCTTATTAGAATATTCCACTTAAACATGGCATTACAAAAGGTAGCTTATTAGAATATTCCACT                                  |
| b13011                  | TGCCATGTTAAGTGAATATTCTAATAAGCTACCTTTTGAAGTGCATGTTAAGTGAATATTCTAATAAGCTA                                          |
| b13012                  | TCGATAGCTTATTAGAATATTCCACTTAAACATGGCATTACAAAAGGTAGCTTATTAGAATATTCCACTTAAACAT                                     |
| b13021                  | CTGCCATGTTAAGTGAATATTCTAATAAGCTACCTTTTGAAGTGCATGTTAAGTGAATATTCTAATAAGCTA                                         |
| b13022                  | TTATTAGAATATTCCACTTAAACATGGCATTACAAAAGGTAGCTTATTAGAATATTCCACTTAAACATGGCAGGTAC                                    |
| b13023                  | CTTTTGAAGTGCATGTTAAGTGAATATTCTAATAAGCTACCTTTTGAAGTGCATGTTA                                                       |
| b13024                  | CATGGCATTACAAAAGGTAGCTTATTAGAATATTCCACTTAAACATGGCATTACAAAAGGTAGC                                                 |
| b13025                  | AGTGAATATTCTAATAAGCTATCGATTGTAAGTGCAGCGCCGCGTGCAG                                                                |
| b13026                  | CCGGTGCAGCGCGGCTGGCATTACAATCGATAGCTTATTAGAATATTCCACTTAA                                                          |
| b13070                  | GGCCGCTTATTTGCTTTTGTATAAGCTGCCTTTTGAAGTGCATGTTAATTATTTGCTTTTGTATAAGCTGCCTTTTGTATA                                |
| b13071                  | CATTACAAAAGGCAGCTTATACAAAAGCAAATAAATACATGGCATTACAAAAGGCAGCTTATACAAAAGCAAATAAAGC                                  |
| b13072                  | AGTGCCATGTTTATTATTTGCTTTTGTATAAGCTGCCTTTTGAAGTGCATGTTAATTATTTGCTTTTGTATAAGCTGC                                   |
| b13073                  | CCGGGCGAGCTTATACAAAAGCAAATAAATACATGGCATTACAAAAGGCAGCTTATACAAAAGCAAATAAATACATGG                                   |
| b13086                  | GGCCGCGGAATATTCTAATAAGCTACCTTCTTTTGAAGTGCATGTTAAGTGAATATTCTAATAAGCTACCTTCTTTTGTATA                               |
| b13087                  | CATTACAAAAGGAAGGTAGCTTATTAGAATATTCTAATAAGCTGCATGTTAAGTGAATATTCTAATAAGCTACCTT                                     |
| b13088                  | AGTGCATGTTAAGTGAATATTCTAATAAGCTACCTTCTTTTGAAGTGCATGTTAAGTGAATATTCTAATAAGCTACCTT                                  |
| b13089                  | CCGGGAAGGTAGCTTATTAGAATATTCTAATAAGCTGCATGTTAAGTGAATATTCTAATAAGCTACCTTCTTTTGTATA                                  |
| b13102                  | GGCCGCTCAGAGTTTGAATAAGCTACCTTTTGAAGTGCATGTTAAGTGCATGTTAAGTGCATGTTAAGTGCATGTTAAGTGCATGTTA                         |
| b13103                  | CATTACAAAAGGTAGCTTATTCTAATAAGCTGCATGTTAAGTGCATGTTAAGTGCATGTTAAGTGCATGTTAAGTGCATGTTAAGTGCATGTTA                   |
| b13104                  | AGTGCATGTTAAGTGCATGTTAAGTGCATGTTAAGTGCATGTTAAGTGCATGTTAAGTGCATGTTAAGTGCATGTTAAGTGCATGTTAAGTGCATGTTA              |
| b13105                  | CCGGTGCATGTTAAGTGCATGTTAAGTGCATGTTAAGTGCATGTTAAGTGCATGTTAAGTGCATGTTAAGTGCATGTTAAGTGCATGTTAAGTGCATGTTA            |
| b13035                  | CGCGGGCCCGGATCCACCGGAGTAC                                                                                        |
| b13036                  | TCCGGTGGATCCCGGGCCCGGATC                                                                                         |
| ch-5                    | TTAACCGGTATGGCTGAAGGATCCGTCGC                                                                                    |
| b12009                  | TTTGCGGCGCTCACTCTCCATCACGCCGATC                                                                                  |
| b13078                  | GGCCGATTGACTTCAAGATAATAAGCTGCTCCTTTTGAAGTGCATGTTAATTGACTTCAAGATAATAAGCTGCTCCTTTTGTATA                            |
| b13079                  | CATTACAAAAGGAGCAGCTTATTATCTTGAAGTCAATTAACATGGCATTACAAAAGGAGCAGCTTATTATCTTGAAGTCAATG                              |
| b13080                  | AGTGCATGTTAATTGACTTCAAGATAATAAGCTGCTCCTTTTGAAGTGCATGTTAATTGACTTCAAGATAATAAGCTGCTC                                |
| b13081                  | CCGGGAGCAGCTTATTATCTTGAAGTCAATTAACATGGCATTACAAAAGGAGCAGCTTATTATCTTGAAGTCAATTAACATG                               |
| b13094                  | GGCCGCAAAAATCTGTTAGATAAGCTACCTTTTGAAGTGCATGTTAAGTGCATGTTAAGTGCATGTTAAGTGCATGTTAAGTGCATGTTAAGTGCATGTTA            |
| b13095                  | CATTACAAAAGGTAGCTTATTCTAATAAGCTGCATGTTAAGTGCATGTTAAGTGCATGTTAAGTGCATGTTAAGTGCATGTTAAGTGCATGTTAAGTGCATGTTA        |
| b13096                  | AGTGCATGTTAAGTGCATGTTAAGTGCATGTTAAGTGCATGTTAAGTGCATGTTAAGTGCATGTTAAGTGCATGTTAAGTGCATGTTAAGTGCATGTTAAGTGCATGTTA   |
| b13097                  | CCGGTGCATGTTAAGTGCATGTTAAGTGCATGTTAAGTGCATGTTAAGTGCATGTTAAGTGCATGTTAAGTGCATGTTAAGTGCATGTTAAGTGCATGTTAAGTGCATGTTA |

**Table S1. Cont.**

| Name            | Primer sequences             |
|-----------------|------------------------------|
| For RT-PCR      |                              |
| b13032-EYFP-F   | TGAAGCAGCACGACTTCTTCAAGTC    |
| b13033-EYFP-R   | TGTTGTGGCGGATCTTGAAGTTC      |
| b13039-mKate-F  | TGGAGGGCACCGTGAACAACCAC      |
| b13040-TagBFP-F | TGGAGGGCACCGTGGACAACCAT      |
| b13041-mKate-R  | GGTTTTGCTGCCGTACATGAAGCTG    |
| b13042-TagBFP-R | GGTCTTGCTGCCGTAGAGGAAGCTA    |
| ch66-miR21-F    | CCTAGCTTATCAGACTGATGTTGAAAA  |
| ch77-R          | ATCGAGCACCCAGTTACGCATGCCG    |
| ch78-U6-F       | CCTCGTGAAGCGTCCATATTCTAAA    |
| Actin-F         | GCTCGTCGTCGACAACGGCTC        |
| Actin-R         | CAAACATGATCTGGGTCATCT        |
| b14001-miR18a-F | CCTAAGGTGCATCTAGTGCAGATAGAAA |

**Table S2. Transfection configuration**

| Plasmid DNA                                                | Amount  |         |         |     |     |     |
|------------------------------------------------------------|---------|---------|---------|-----|-----|-----|
| Used in Fig. 2 and Fig. S2                                 |         |         |         |     |     |     |
| pCAG-rtTA-2A-Puro-FF5, ng                                  | 100     |         |         |     |     |     |
| pCAG-TagBFP-FF5, ng                                        | 100     |         |         |     |     |     |
| phEF1 $\alpha$ -mKate-4xPDCD4, ng                          | 50      |         |         |     |     |     |
| pTRE-EYFP-4xPDCD4, ng                                      | 50      |         |         |     |     |     |
| phEF1 $\alpha$ -iRFP-miR-21, ng                            | x       |         |         |     |     |     |
| pDT7004, ng                                                | 200 - x |         |         |     |     |     |
| x = 5, 10, 20, 40, 60, 80, 100, 120, 140, 160, 180, 200    |         |         |         |     |     |     |
| Final concentration of Dox, ng/mL                          | y       |         |         |     |     |     |
| y = 0, 200                                                 |         |         |         |     |     |     |
| Used in Fig. 3B                                            |         |         |         |     |     |     |
| pDT7004, ng                                                | 60      | 60      | 60      | 60  | 60  |     |
| pCAG-rtTA-2A-Puro-FF5, ng                                  | 100     | 100     | 100     | 100 | 100 | 100 |
| pCAG-TagBFP-FF5, ng                                        | 100     | 100     | 100     | 100 | 100 | 100 |
| phEF1 $\alpha$ -mKate-4xPDCD4, ng                          | 100     | 100     | 100     | 100 | 100 | 100 |
| pTRE-EYFP-MCS, ng                                          | 100     |         |         |     |     |     |
| pTRE-EYFP-1xPDCD4, ng                                      |         | 100     |         |     |     |     |
| pTRE-EYFP-4xPDCD4, ng                                      |         |         | 100     |     |     |     |
| pTRE-EYFP-8xPDCD4, ng                                      |         |         |         | 100 |     |     |
| pTRE-EYFP-12xPDCD4, ng                                     |         |         |         |     | 100 |     |
| phEF1 $\alpha$ -iRFP-miR-21, ng                            | 40      | 40      | 40      | 40  | 40  | 40  |
| Final concentration of Dox, ng/mL                          | y       | y       | y       | y   | y   | y   |
| y = 0, 200                                                 |         |         |         |     |     |     |
| Used in Fig. 3E                                            |         |         |         |     |     |     |
| pDT7004, ng                                                | 60      | 60      | 60      | 60  | 60  | 60  |
| pCAG-rtTA-2A-Puro-FF5, ng                                  | 100     | 100     | 100     | 100 | 100 | 100 |
| pCAG-TagBFP-FF5, ng                                        | 100     | 100     | 100     | 100 | 100 | 100 |
| phEF1 $\alpha$ -mKate-4xPDCD4, ng                          | 100     | 100     | 100     | 100 | 100 | 100 |
| pTRE-EYFP-4xBMPR, ng                                       | 100     |         |         |     |     |     |
| pTRE-EYFP-4xMTAP, ng                                       |         | 100     |         |     |     |     |
| pTRE-EYFP-4xPDCD4, ng                                      |         |         | 100     |     |     |     |
| pTRE-EYFP-4xPDCD4II, ng                                    |         |         |         | 100 |     |     |
| pTRE-EYFP-4xPPARA, ng                                      |         |         |         |     | 100 |     |
| pTRE-EYFP-4xRECK, ng                                       |         |         |         |     |     | 100 |
| phEF1 $\alpha$ -iRFP-miR-21, ng                            | 40      | 40      | 40      | 40  | 40  | 40  |
| Final concentration of Dox, ng/mL                          | y       | y       | y       | y   | y   | y   |
| y = 0, 200                                                 |         |         |         |     |     |     |
| Used in Fig. 4                                             |         |         |         |     |     |     |
| pCAG-rtTA-2A-Puro-FF5, ng                                  | 100     | 100     | 100     |     |     |     |
| pCAG-TagBFP-FF5, ng                                        | 100     | 100     | 100     |     |     |     |
| phEF1 $\alpha$ -mKate-4xPDCD4, ng                          | 50      | 50      | 50      |     |     |     |
| pTRE-EYFP-4xPDCD4, ng                                      | 0       | 50      | 80      |     |     |     |
| phEF1 $\alpha$ -iRFP-miR-21, ng                            | x       | x       | x       |     |     |     |
| pDT7004, ng                                                | 250 - x | 200 - x | 170 - x |     |     |     |
| x = 2.5, 5, 7.5, 10, 20, 40, 60, 80, 100, 120              |         |         |         |     |     |     |
| Final concentration of Dox, ng/mL                          | y       | y       | y       |     |     |     |
| y = 0, 200                                                 |         |         |         |     |     |     |
| Used in Fig. 5B and Fig. S4                                |         |         |         |     |     |     |
| pCAG-rtTA-2A-Puro-FF5, ng                                  | 100     |         |         |     |     |     |
| pCAG-TagBFP-FF5, ng                                        | 100     |         |         |     |     |     |
| phEF1 $\alpha$ -mKate-4xPDCD4, ng                          | 50      |         |         |     |     |     |
| pTRE-EYFP-4xT21, ng                                        | 50      |         |         |     |     |     |
| phEF1 $\alpha$ -iRFP-miR-21, ng                            | x       |         |         |     |     |     |
| pDT7004, ng                                                | 200 - x |         |         |     |     |     |
| x = 0, 5, 10, 20, 40, 60, 80, 100, 120, 140, 160, 180, 200 |         |         |         |     |     |     |
| Final concentration of Dox, ng/mL                          | y       |         |         |     |     |     |
| y = 0, 200                                                 |         |         |         |     |     |     |
| Used in Fig. 5C                                            |         |         |         |     |     |     |
| pCAG-rtTA-2A-Puro-FF5, ng                                  | 100     | 100     | 100     | 100 |     |     |
| pCAG-TagBFP-FF5, ng                                        | 100     | 100     | 100     | 100 |     |     |
| phEF1 $\alpha$ -mKate-4xPDCD4, ng                          | 50      | 80      | 110     |     |     |     |
| phEF1 $\alpha$ -mKate-MCS, ng                              |         |         |         | 110 |     |     |



**Table S2. Cont.**

| Plasmid DNA                                              | Amount    |           |           |           |
|----------------------------------------------------------|-----------|-----------|-----------|-----------|
| pTRE-EYFP-4xT21, ng                                      | 50        | 50        | 50        | 50        |
| phEF1 $\alpha$ -iRFP-miR-21, ng                          | $x$       | $x$       | $x$       | $x$       |
| pDT7004, ng                                              | $200 - x$ | $170 - x$ | $140 - x$ | $140 - x$ |
| $x = 0, 1.25, 2.5, 5, 10, 20, 40, 60, 80, 100, 120, 140$ |           |           |           |           |
| Final concentration of Dox, ng/mL                        | $y$       | $y$       | $y$       | $y$       |
| $y = 0, 200$                                             |           |           |           |           |
| Used in Fig. 5D                                          |           |           |           |           |
| pCAG-rtTA-2A-Puro-FF5, ng                                | 100       | 100       | 100       | 100       |
| pCAG-TagBFP-FF5, ng                                      | 100       | 100       | 100       | 100       |
| phEF1 $\alpha$ -mKate-4xBMPR, ng                         | 110       |           |           |           |
| phEF1 $\alpha$ -mKate-4xPDCD4, ng                        |           | 110       |           |           |
| phEF1 $\alpha$ -mKate-4xRECK, ng                         |           |           | 110       |           |
| phEF1 $\alpha$ -mKate-MCS, ng                            |           |           |           | 110       |
| pTRE-EYFP-4xT21, ng                                      | 50        | 50        | 50        | 50        |
| phEF1 $\alpha$ -iRFP-miR-21, ng                          | $x$       | $x$       | $x$       | $x$       |
| pDT7004, ng                                              | $140 - x$ | $140 - x$ | $140 - x$ | $140 - x$ |
| $x = 0, 1.25, 2.5, 5, 10, 20, 40, 60, 80, 100, 120, 140$ |           |           |           |           |
| Final concentration of Dox, ng/mL                        | $y$       | $y$       | $y$       | $y$       |
| $y = 0, 200$                                             |           |           |           |           |
| Used in Fig. S1 A and B                                  |           |           |           |           |
| pCAG-rtTA-2A-Puro-FF5, ng                                | 100       |           |           |           |
| pCAG-TagBFP-FF5, ng                                      | 100       |           |           |           |
| phEF1 $\alpha$ -mKate-4xPDCD4, ng                        | 50        |           |           |           |
| pTRE-EYFP-4xPDCD4, ng                                    | 50        |           |           |           |
| phEF1 $\alpha$ -iRFP-miR-21, ng                          |           |           |           |           |
| pDT7004, ng                                              | 200       |           |           |           |
| Final concentration of Dox, ng/mL                        | 200       |           |           |           |
| Used in Figs. S1 C-F and S5B                             |           |           |           |           |
| pDT7004, ng                                              | 100       | 300       |           |           |
| pCAG-rtTA-2A-Puro-FF5, ng                                | 100       |           |           |           |
| pCAG-TagBFP-FF5, ng                                      | 100       |           |           |           |
| phEF1 $\alpha$ -mKate-4xPDCD4, ng                        | 100       |           |           |           |
| TRE-EYFP-4xPDCD4, ng                                     | 100       |           |           |           |
| phEF1 $\alpha$ -iRFP-miR-21, ng                          |           | 200       |           |           |
| Final concentration of Dox, ng/mL                        | 200       |           |           |           |
| Used in Fig. S5 A and C                                  |           |           |           |           |
| pCAG-rtTA-2A-Puro-FF5, ng                                | 100       |           |           |           |
| pCAG-TagBFP-FF5, ng                                      | 100       |           |           |           |
| phEF1 $\alpha$ -mKate-4xPDCD4, ng                        | 100       |           |           |           |
| pTRE-EYFP-4xPDCD4, ng                                    | 100       |           |           |           |
| phEF1 $\alpha$ -iRFP-miR-21, ng                          | 100       |           |           |           |
| Final concentration of Dox, ng/mL                        | $y$       |           |           |           |
| $y = 0, 200$                                             |           |           |           |           |
| Used in Fig. S6                                          |           |           |           |           |
| pDT7004, ng                                              | 450       |           |           |           |
| phEF1 $\alpha$ -mKate-4xPDCD4                            | 50        |           |           |           |

**Table S3. Fit parameters**

| Parameter   | Value, Fig. 2C   | Value, Fig. 3B   | Value, Fig. 3E   |
|-------------|------------------|------------------|------------------|
| $K_m$       | 0.65             | 0.36             | 0.35             |
| $B_m$       | 1.66             | 2.50             | 2.61             |
| $K_e$       | 1.09             | 0.99             | 0.74             |
| $B_e$       | 2.05             | 1.70             | 2.28             |
| $K_t$       | 2.05             | 2.20             | 2.20             |
| $B_t$       | 1.60             | 0.35             | 0.49             |
| $K_1$       | 2.27             | 1.50             | 1.50             |
| $K_2$       | 3.20             | 5.00             | 4.50             |
| $\lambda_1$ | 5.68             | 4.01             | 4.00             |
| $\lambda_2$ | 6.00             | Shown in Fig. 3C | Shown in Fig. 3F |
| $\sigma$    | 1.25             | 1.00             | 1.00             |
| $\theta_1$  | Shown in Fig. 2C | 103.98           | 137.00           |
